# Supplementary material for: Neuroprotective Effects of Growth Hormone (GH) and Insulin-Like Growth Factor Type 1 (IGF-1) after Hypoxic-Ischemic Injury in Chicken Cerebellar Cell Cultures
Source: MDPI journal article supplement (doi:10.3390/ijms22010256), 2020-12-29
Supplement: s1 [file s1]

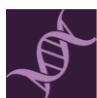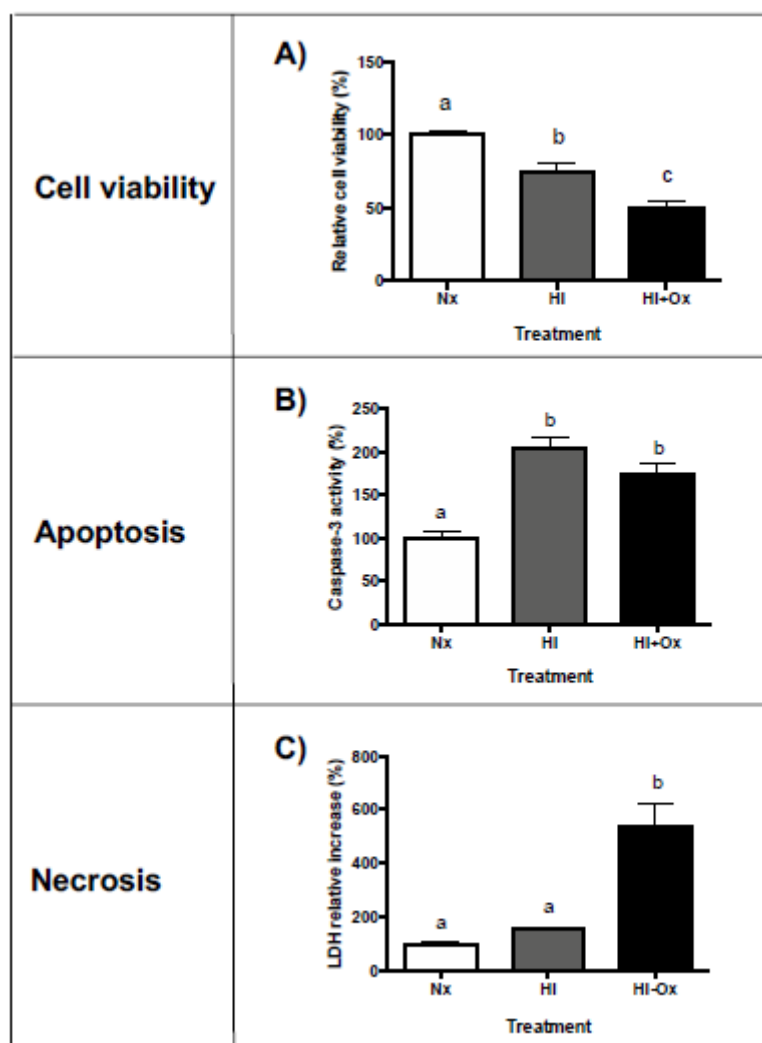

**Figure S1.** Determination of cell viability, apoptosis and necrosis in primary cerebellar cultures exposed to normoxic (Nx), acute hypoxia-ischemia (HI) injury, or sub-acute hypoxia-ischemia (HI-Ox) injury. A) Cell viability was analyzed by the trypan blue exclusion method. Bars represent the mean  $\pm$  SEM,  $n=3$  independent experiments performed by duplicate. B) Apoptosis was studied by measuring caspase-3 activity. Bars represent the mean  $\pm$  SEM,  $n=5$  independent experiments performed by duplicate. C) Necrosis was evaluated by analyzing the activity of lactate dehydrogenase (LDH) released to the culture media. Bars represent the mean  $\pm$  SEM,  $n=5$  independent experiments performed in duplicate. Groups with different letters are significantly different by one-way ANOVA and Tukey's *post-hoc* test ( $p < 0.01$ ).
